# Supplementary material for: Prediction of stoichiometric PoHn compounds: crystal structures and properties
Source: Royal Society of Chemistry journal article supplement (doi:10.1039/c5ra19223d), 2015-01-01
Supplement: c5ra19223d1.pdf [file c5ra19223d1.pdf]

## Supplementary information

### **Prediction of stoichiometric $\text{PoH}_n$ compounds: crystal structures and properties**

Yunxian Liu, Defang Duan, Fubo Tian, Chao Wang, Gang Wu, Yanbin Ma, Hongyu Yu, Da Li, Bingbing Liu and Tian Cui\*

*State Key Laboratory of Superhard Materials, College of Physics, Jilin University,  
Changchun 130012, People's Republic of China*

\*Corresponding Author: E-mail: [cuitian@jlu.edu.cn](mailto:cuitian@jlu.edu.cn)

**Fig. S1:** Fig. S1: the band structures of  $\text{PoH-P6}_3/mmc$  and  $\text{PoH}_2\text{-Pnma}$  phases by GGA and hybrid functional HSE06 functions. (a)  $\text{PoH-P6}_3/mmc$  at 300 GPa with GGA, (b)  $\text{PoH-P6}_3/mmc$  at 300 GPa with HSE, (c)  $\text{PoH}_2\text{-Pnma}$  at 200 GPa with GGA, (d)  $\text{PoH}_2\text{-Pnma}$  at 200 GPa with HSE.

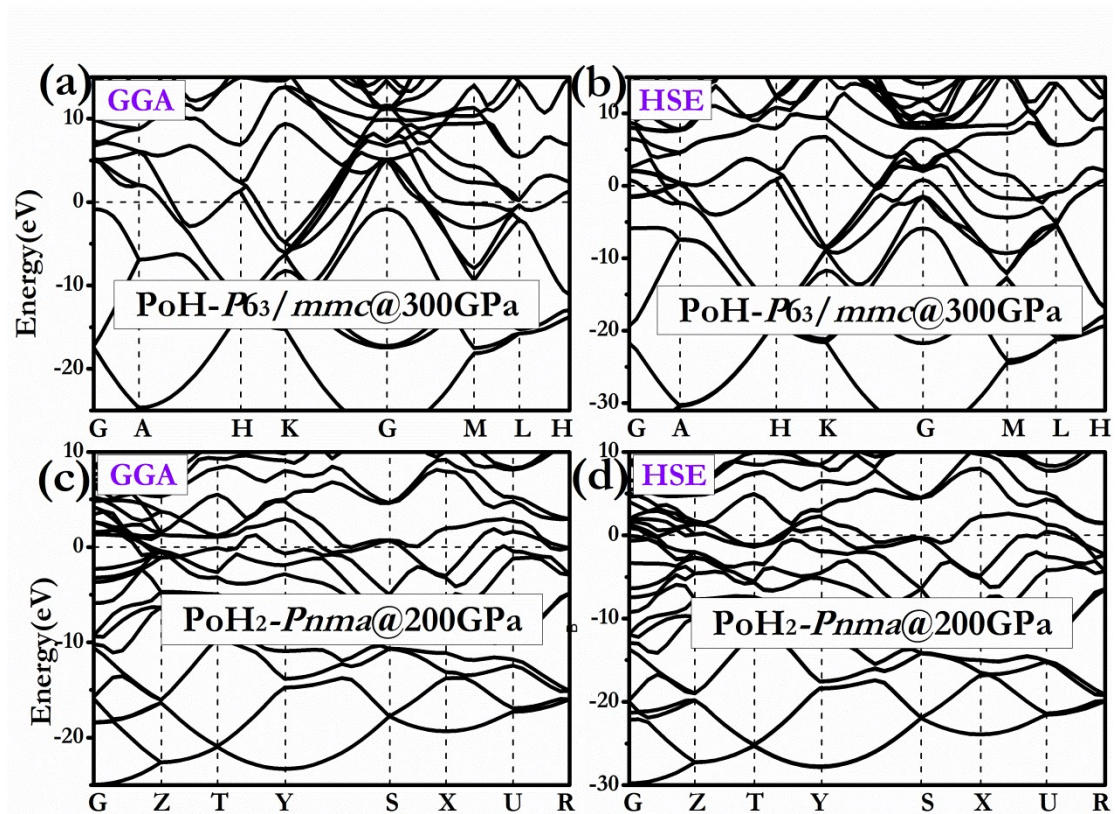

**Table S1:** Structural parameters of our predicted stable structures of Po-H system at selected pressure.

| Space group<br>Pressure              | Lattice parameters<br>(Å, °)                                               | Atomic coordinates (fractional)                                                                                                                                        | Sites                            |
|--------------------------------------|----------------------------------------------------------------------------|------------------------------------------------------------------------------------------------------------------------------------------------------------------------|----------------------------------|
| PoH- $P6_3/mmc$<br>300 GPa           | a= b=2.8459<br>c=4.8312<br>$\alpha=\beta= 90$<br>$\gamma=120$              | H1 0.0000 0.000 0.5000<br>Po1 0.3333 0.6667 0.2500                                                                                                                     | 2a<br>2c                         |
| PoH <sub>2</sub> - $Cmcm$<br>50 GPa  | a=3.2484<br>b=9.8562<br>c=3.3948<br>$\alpha=\beta=\gamma=90$               | H1 0.1221 0.5485 0.7500<br>Po1 0.5000 0.6538 1.2500                                                                                                                    | 8g<br>4c                         |
| PoH <sub>2</sub> - $Pnma$<br>300 GPa | a=5.2680<br>b=2.8290<br>c=4.4494<br>$\alpha=\beta=\gamma=90$               | H1 0.5181 0.2500 0.0275<br>H5 0.4581 0.7500 0.7917<br>Po1 0.1868 0.2500 0.8614                                                                                         | 4c<br>4c<br>4c                   |
| PoH <sub>4</sub> - $C2/c$<br>200 GPa | a=4.0763<br>b=4.0845<br>c=7.8923<br>$\alpha=\gamma=90$<br>$\beta=138.1964$ | H1 -0.6353 -0.1896 -0.0539<br>H2 -0.1652 0.0541 -0.9026<br>Po1 -0.5000 0.1046 -0.7500                                                                                  | 8f<br>8f<br>4e                   |
| PoH <sub>6</sub> - $C2/m$<br>200 GPa | a=12.1357<br>b=2.7962<br>c=2.9633<br>$\alpha=\gamma=90$<br>$\beta=90.2911$ | H1 -0.5308 0.3516 0.2507<br>H5 -0.7866 0.0000 0.8301<br>H7 -0.7432 0.0000 0.1590<br>H9 -0.1527 0.0000 0.2803<br>H11 -0.2476 0.0000 0.5733<br>Po1 -0.6108 0.0000 0.7529 | 8j<br>4i<br>4i<br>4i<br>4i<br>4i |

**Table S2** The calculated the logarithmic average phonon frequency  $\omega_{\log}$ , electronic density of states at the Fermi level  $N(E_f)$  (states/spin/Ry/Unit cell), electron-phonon coupling parameters ( $\lambda$ ), and superconducting critical temperatures  $T_c$  of  $\text{PoH}_4\text{-C2}/c$  at different pressures.

| P(GPa) | $\omega_{\log}$ (K) | $N(\epsilon_f)$ | $\lambda$ | $T_c(\text{K})\mu^*=0.1$ | $T_c(\text{K})\mu^*=0.13$ |
|--------|---------------------|-----------------|-----------|--------------------------|---------------------------|
| 150    | 423.8               | 8.05            | 1.18      | 37.2                     | 32.9                      |
| 200    | 603                 | 7.7             | 1.08      | 47.2                     | 41.2                      |
| 250    | 804.2               | 7.39            | 0.97      | 53.6                     | 45.7                      |
